# Supplementary material for: Pilot Study: FSHR Expression in Neuroendocrine Tumors of the Appendix
Source: MDPI journal article supplement (doi:10.3390/jcm12155086), 2023-08-02
Supplement: s1 [file s1]

CgA x5, Appendix wall

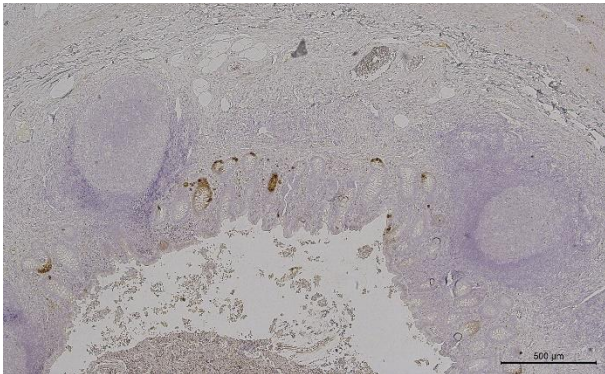

CgA x40, Submucous layer

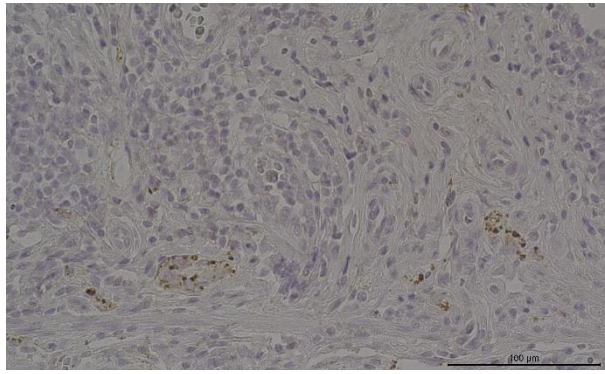

CgA x40, Muscular layer

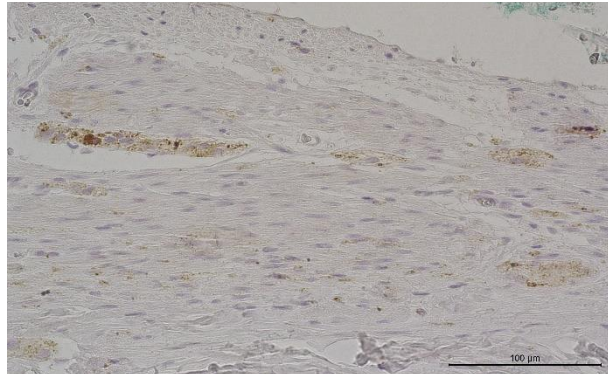

CgA x5, Appendix wall

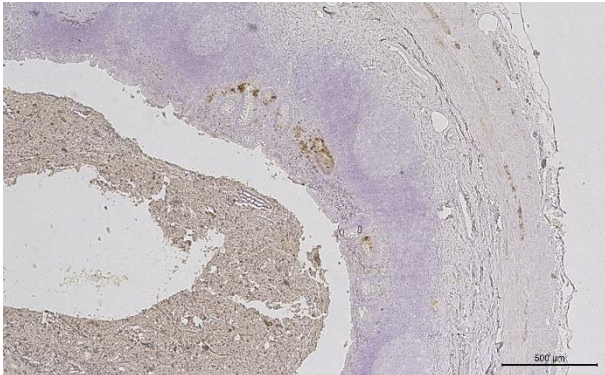

CgA x10, Appendix wall

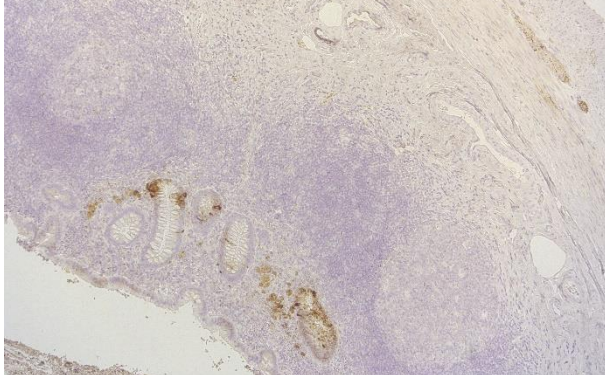

CgA x20, Mucous layer

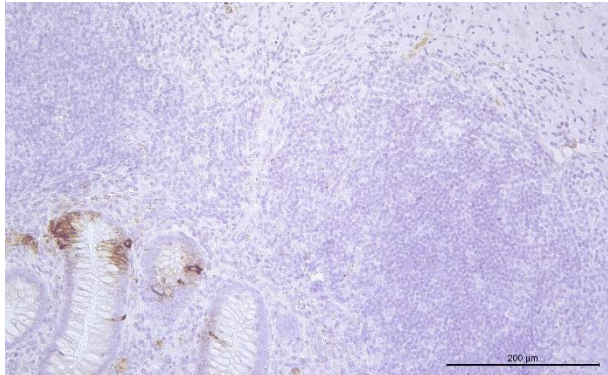

CgA x40, Mucous layer

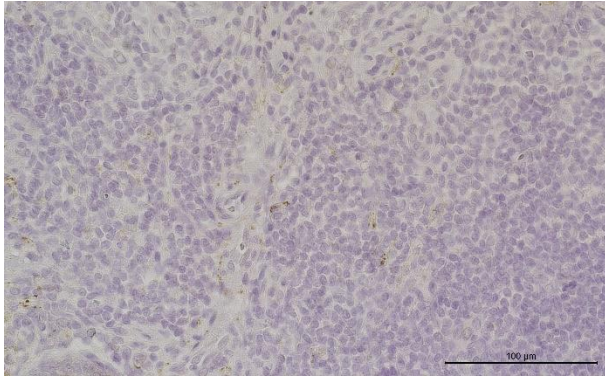

CgA x40, Mucous layer

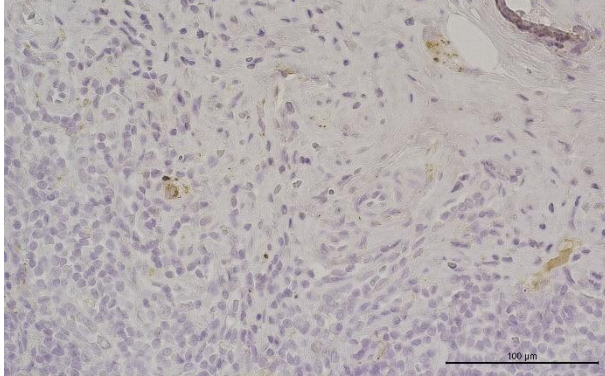

CgA x40, Muscular layer

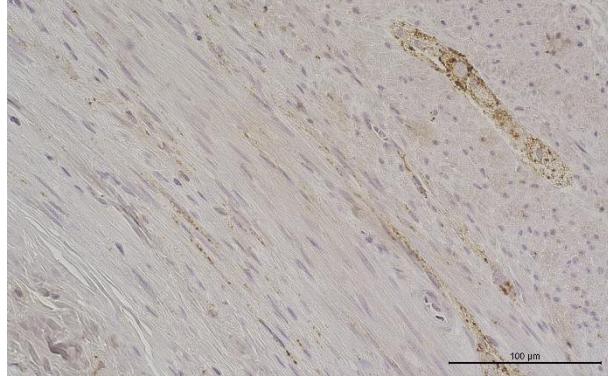

Supplementary data: Representative figures of patient's diagnostic panel. Sample numbers have been coded.



N2XXXXX\_6\_4\_Ki-67

Ki-67 x5, Appendix wall

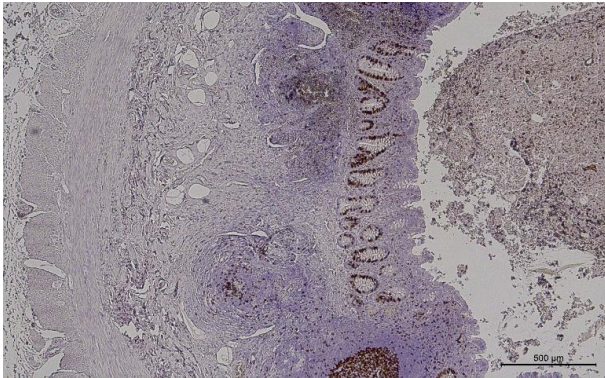

Ki-67 x5, Appendix wall

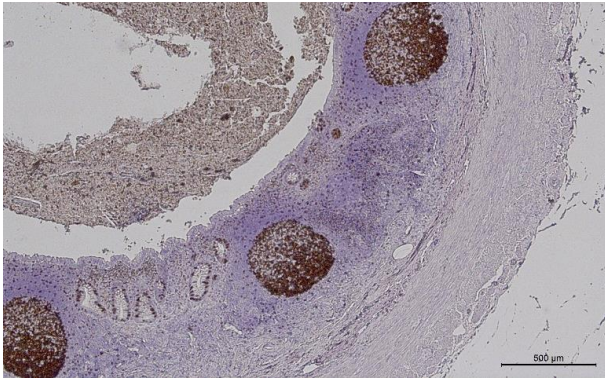

Ki-67 x10, Appendix wall

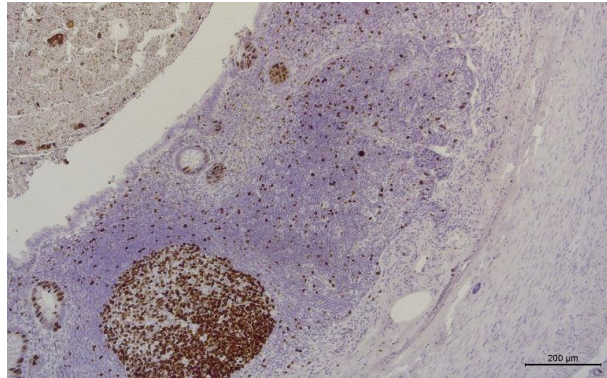

Ki-67 x20, Appendix wall

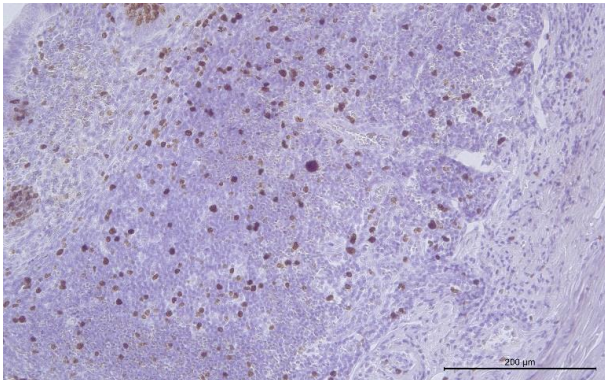

Ki-67 x40, Mucous layer

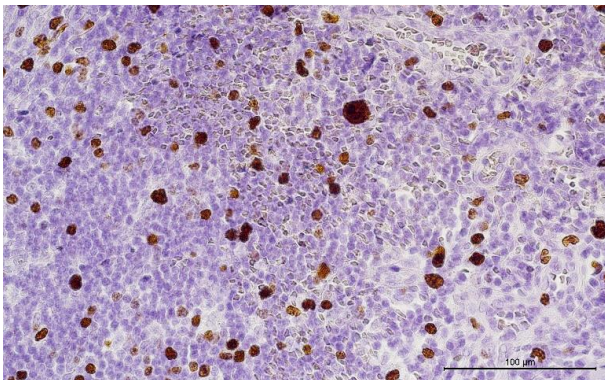

Supplementary data: Representative figures of patient’s diagnostic panel. Sample numbers have been coded.  
Magnification of the lens is given, Leica DM5000B, Wetzlar, Germany.



Syn x5, Appendix wall

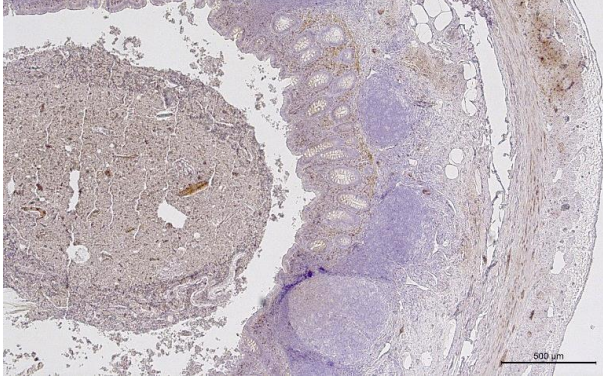

Syn x10, Appendix wall

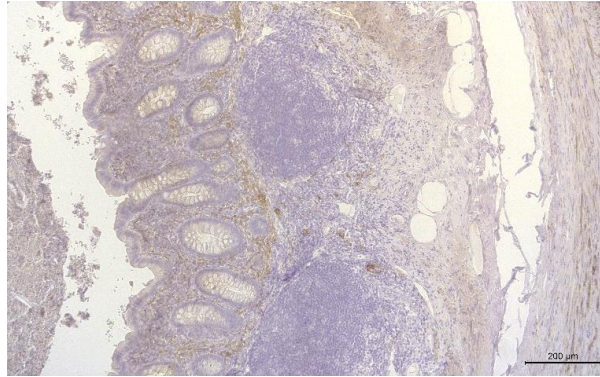

Syn x20, Appendix wall

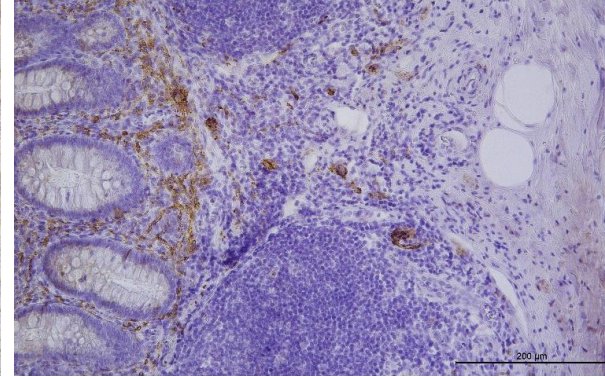

Syn x40, Mucous and submucous

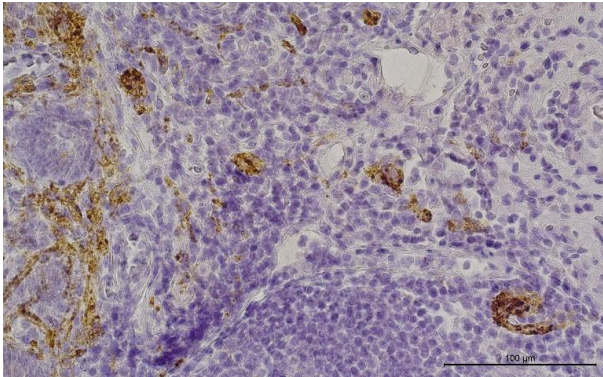

Syn x40, Muscular layer

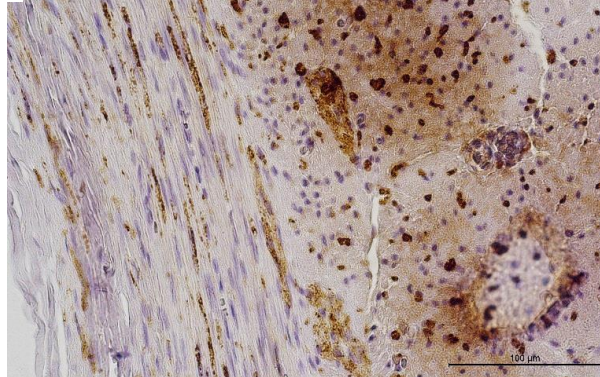

Supplementary data: Representative figures of patient's diagnostic panel. Sample numbers have been coded.  
Magnification of the lens is given, Leica DM5000B, Wetzlar, Germany.



N5XXXX\_6\_3\_Ki67

Ki67 x5, Appendix wall

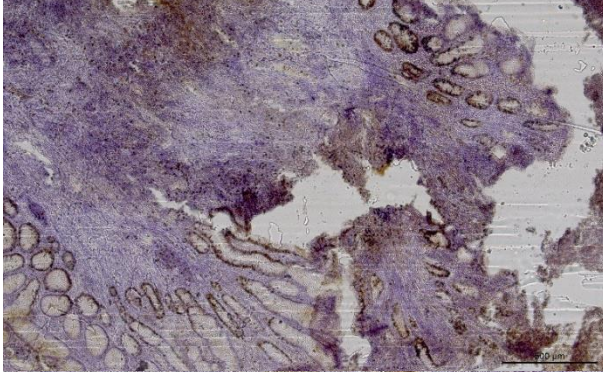

Ki67 x5, Appendix wall

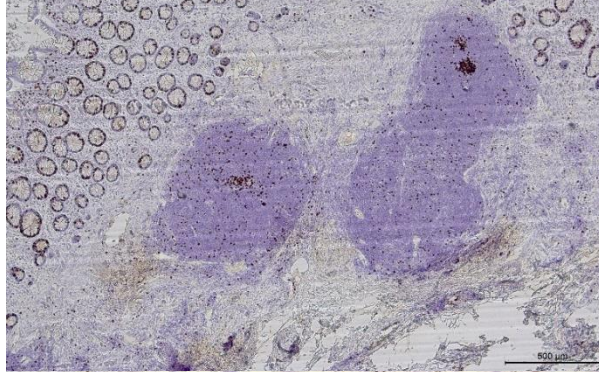

Ki67 x5, Appendix wall

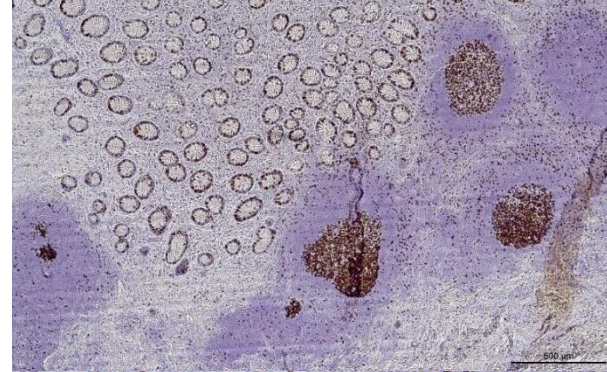

Ki67 x5, Appendix wall

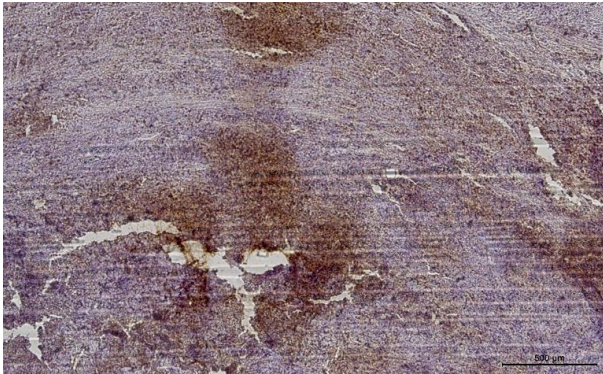

Ki67 x10, Appendix wall

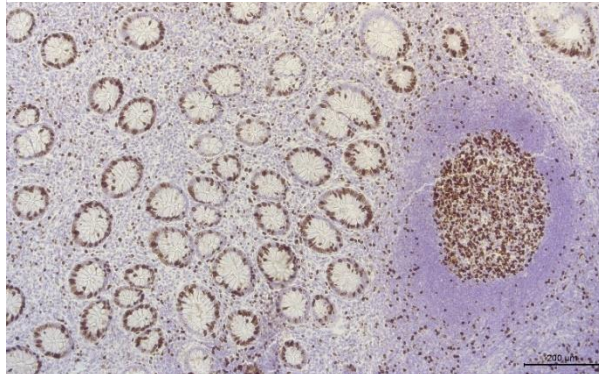

Ki67 x10, Appendix wall

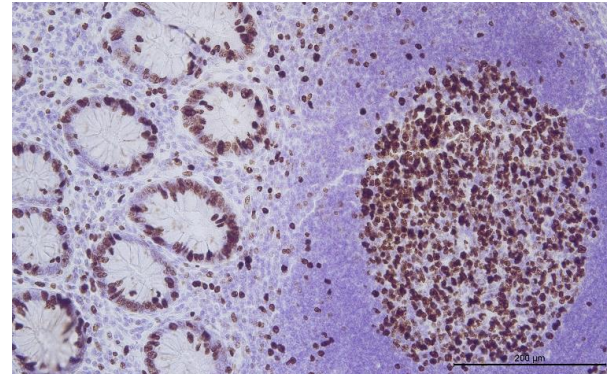

Ki67 x10, Appendix wall

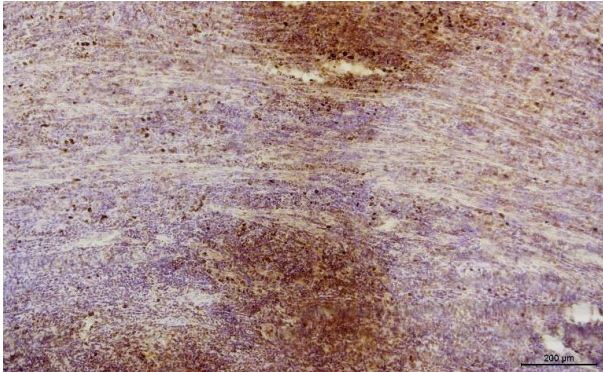

Ki67 x20, Appendix wall

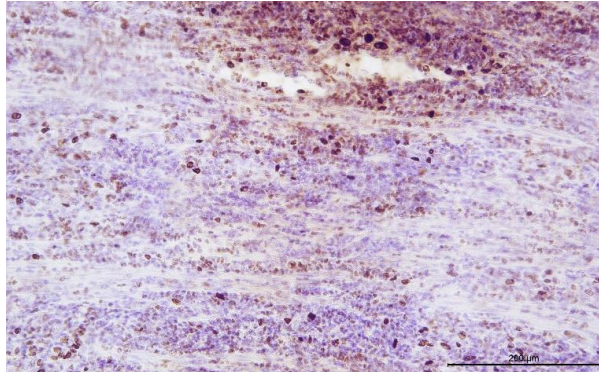

Ki67 x40, Mucous layer

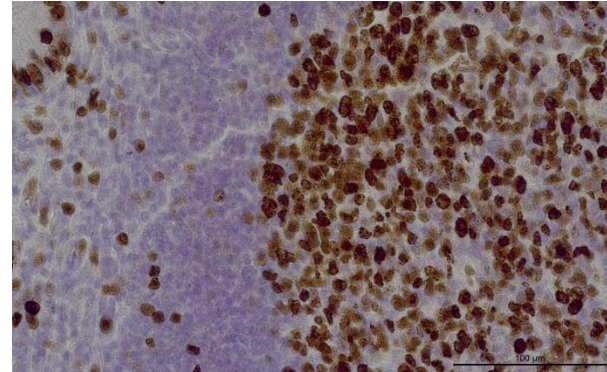

Supplementary data: Representative figures of patient's diagnostic panel. Sample numbers have been coded.



Syn x5, Appendix wall

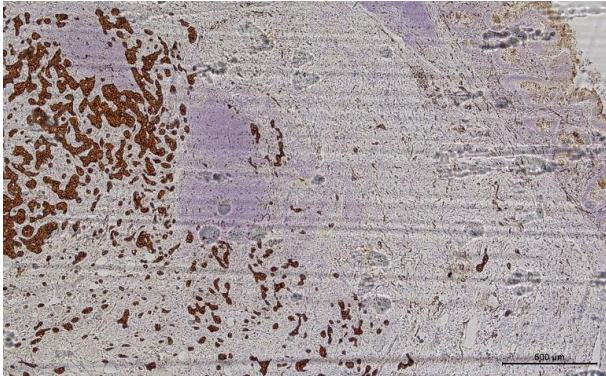

Syn x10, Appendix wall

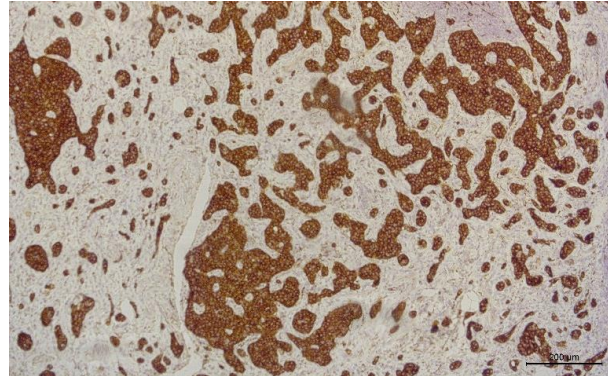

Syn x20, Mucous layer

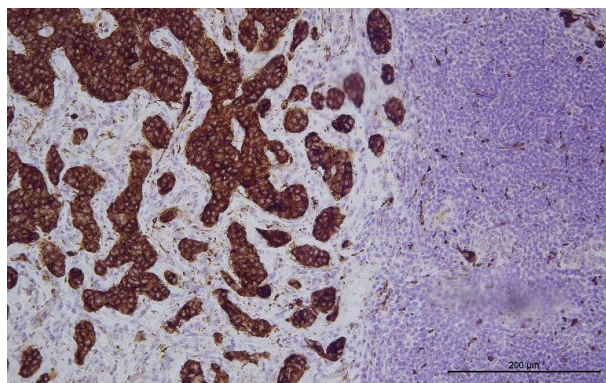

Syn x40, Mucous layer

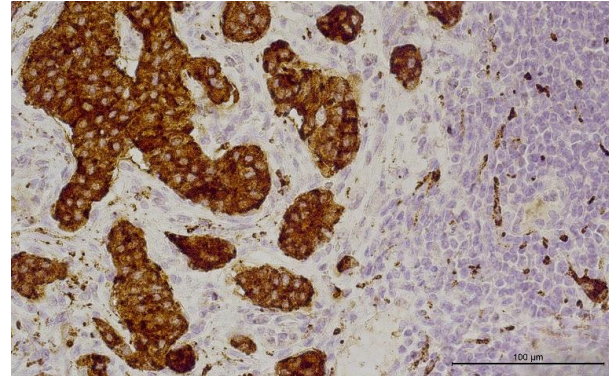

Syn x5, Appendix wall

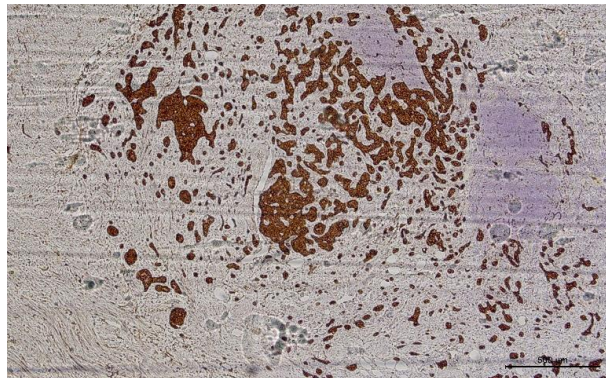

Syn x10, Appendix wall

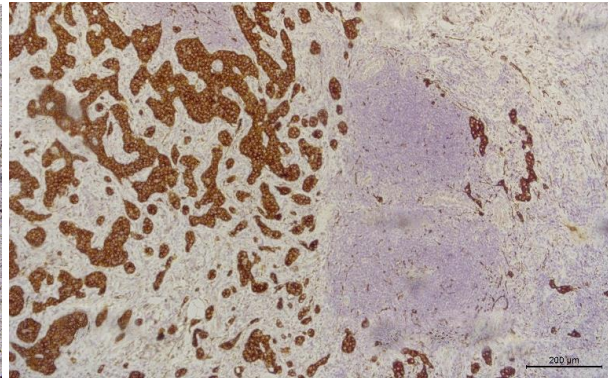

Syn x20, Mucous layer

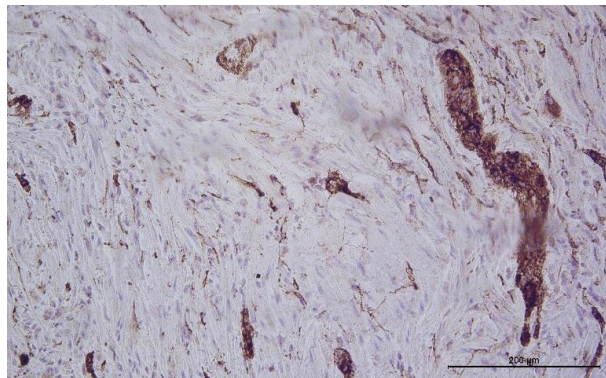

Syn x40, Mucous layer

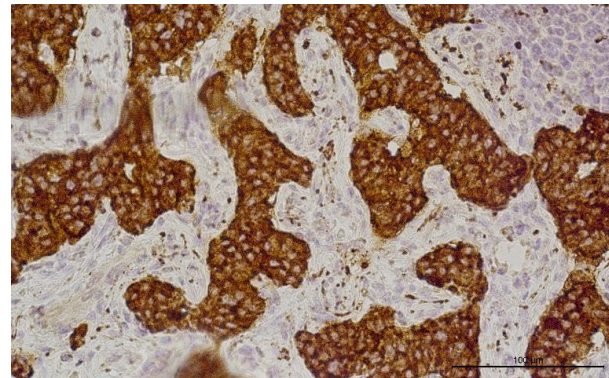

Supplementary data: Representative figures of patient's diagnostic panel. Sample numbers have been coded.  
Magnification of the lens is given, Leica DM5000B, Wetzlar, Germany.



N3XXXX\_6\_2\_Synaptophysin

Syn x20, Mucous and submucous

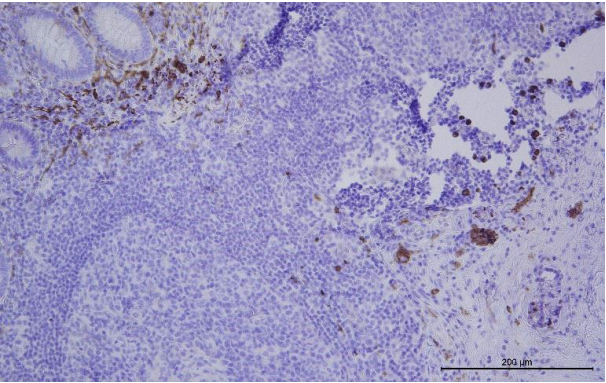

Syn x20, Muscular layer

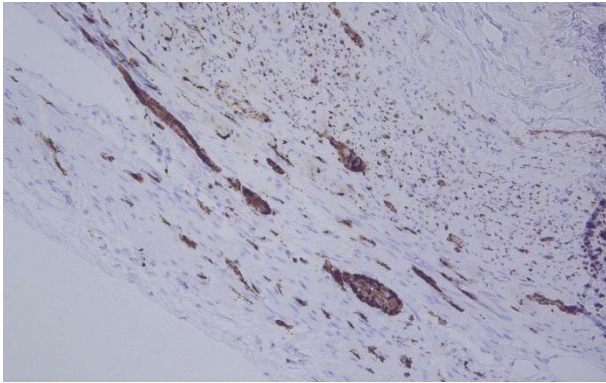

Syn x40, Mucous layer

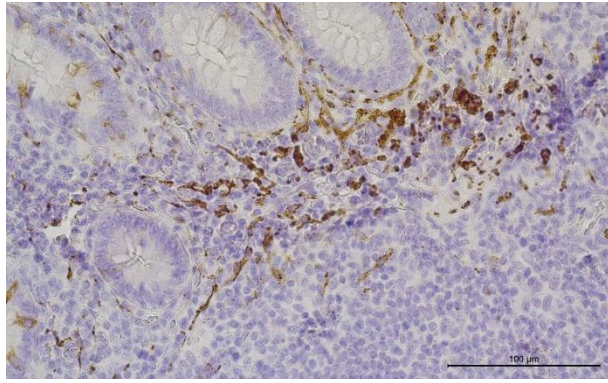

Syn x40, Mucous layer

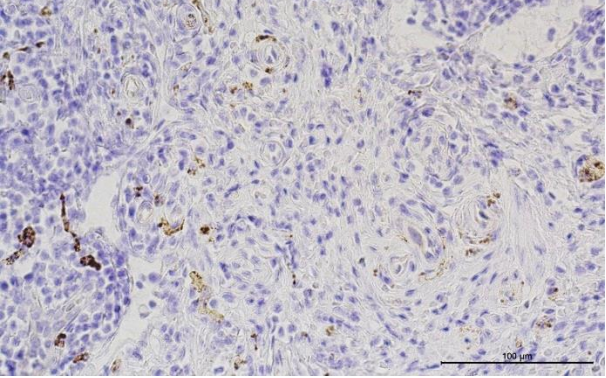

Syn x40, Mucous layer

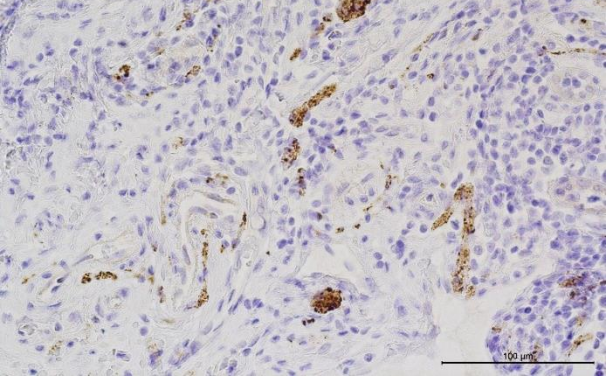

Syn x40, Mucous layer

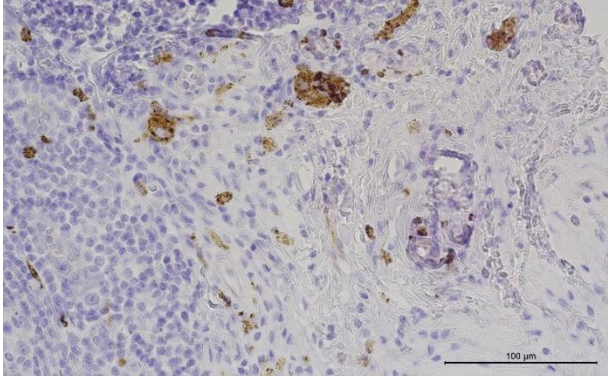

Syn x40, Muscular layer

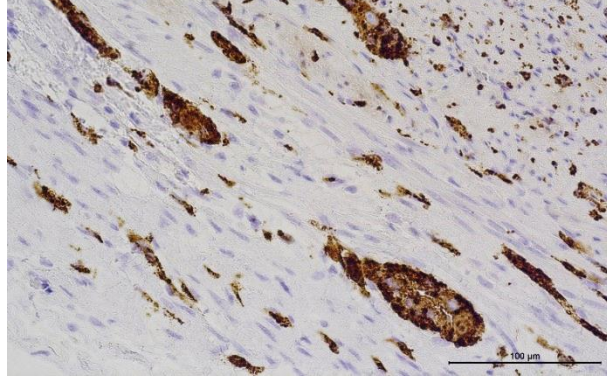

Supplementary data: Representative figures of patient's diagnostic panel. Sample numbers have been coded.  
Magnification of the lens is given, Leica DM5000B, Wetzlar, Germany.



CgA x5, Submucous layer

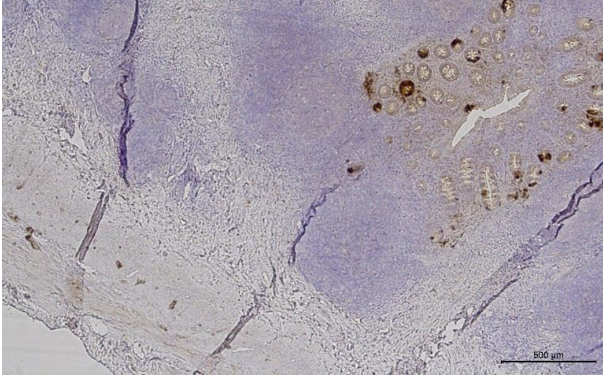

CgA x10, Submucous layer

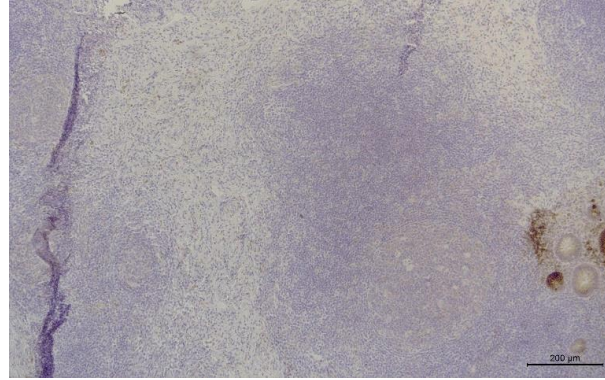

CgA x20, Submucous layer

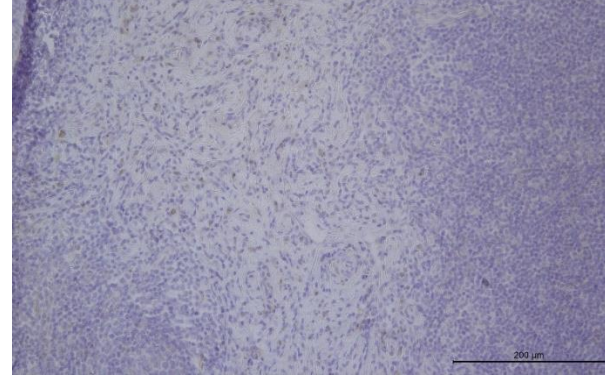

CgA x20, Muscular layer

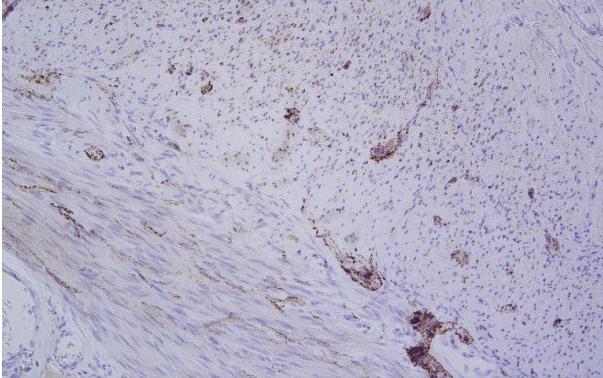

CgA x40, Muscular layer

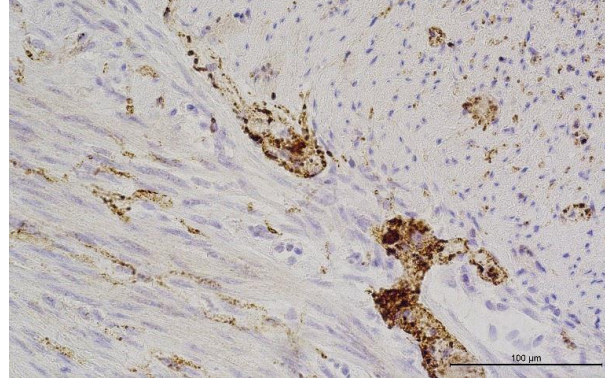

CgA x40, Submucous layer

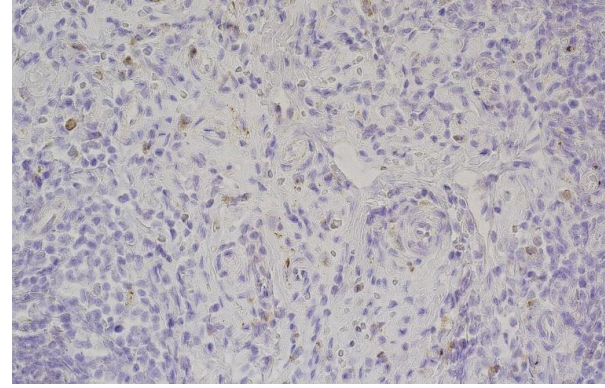

Supplementary data: Representative figures of patient's diagnostic panel. Sample numbers have been coded.  
Magnification of the lens is given, Leica DM5000B, Wetzlar, Germany.



Ki-67 x5, Appendix wall

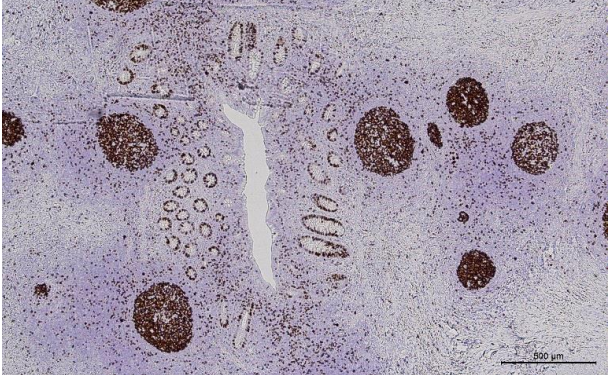

Ki-67 x10, Appendix wall

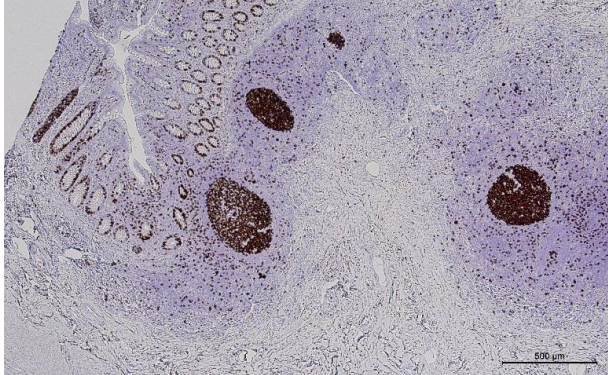

Ki-67 x20, Submucous layer

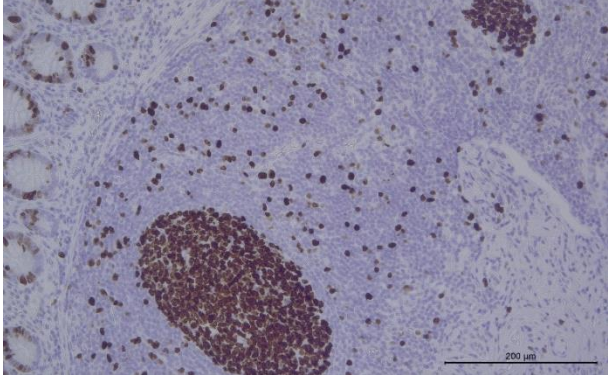

Ki-67 x5, Appendix wall

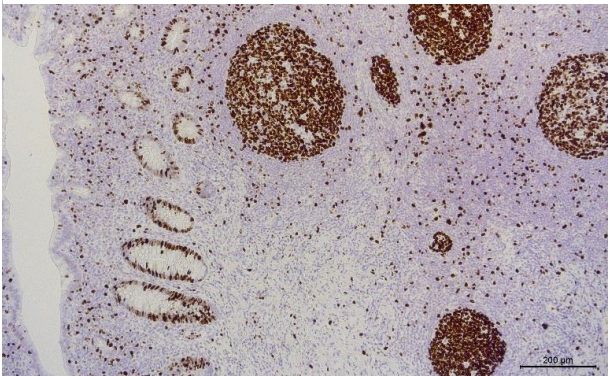

Ki-67 x20, Submucous layer

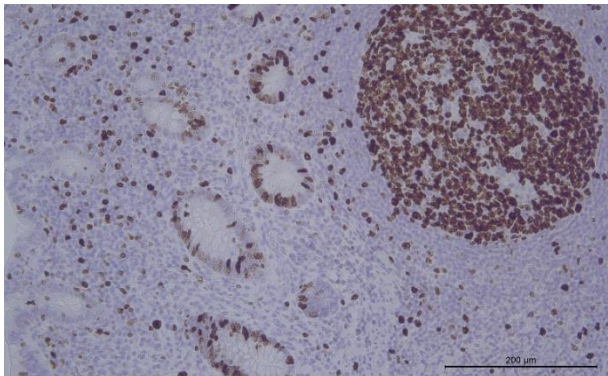

Ki-67 x20, Muscular layer

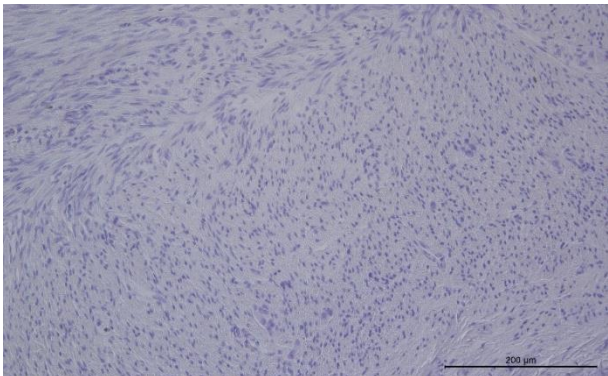

Supplementary data: Representative figures of patient's diagnostic panel. Sample numbers have been coded.  
Magnification of the lens is given, Leica DM5000B, Wetzlar, Germany.
